# Supplementary material
Source: PubMed Central journal article supplement (PMC2651299)
Supplement: 0813306106_0813306106SI.pdf [file 0813306106_0813306106SI.pdf]

# Supporting Information

Hu et al. 10.1073/pnas.0813306106

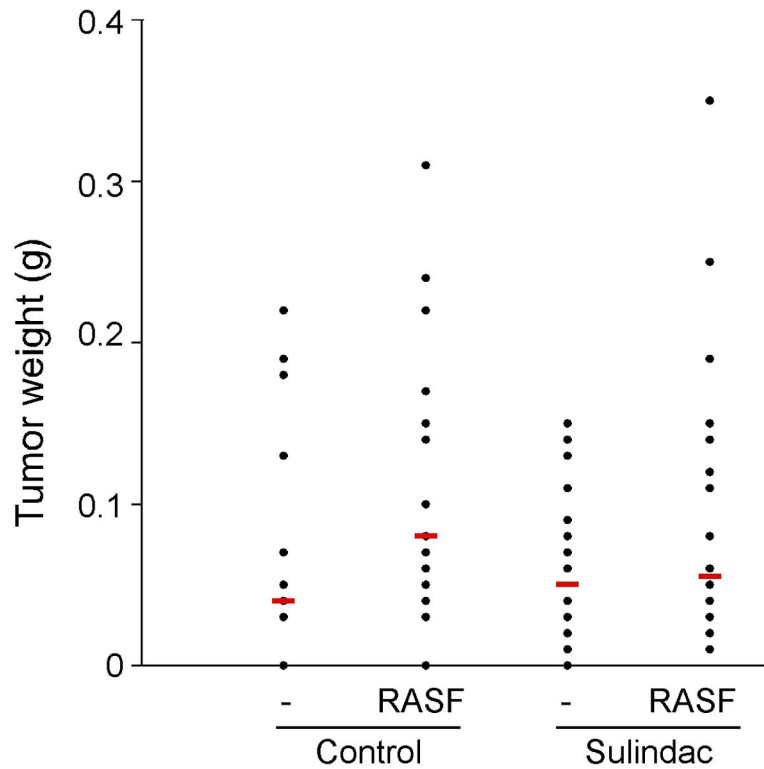

**Fig. S1.** The effect of a nonspecific COX inhibitor (sulindac) on the weight of MCFDCIS xenografts derived from cells injected alone (–) or coinjected with RASFs on control or sulindac-containing diet. Sulindac attenuated the tumor growth-stimulating effects of RASFs, but this was not statistically significant ( $P = 0.4$ ).



## Mouse spleen

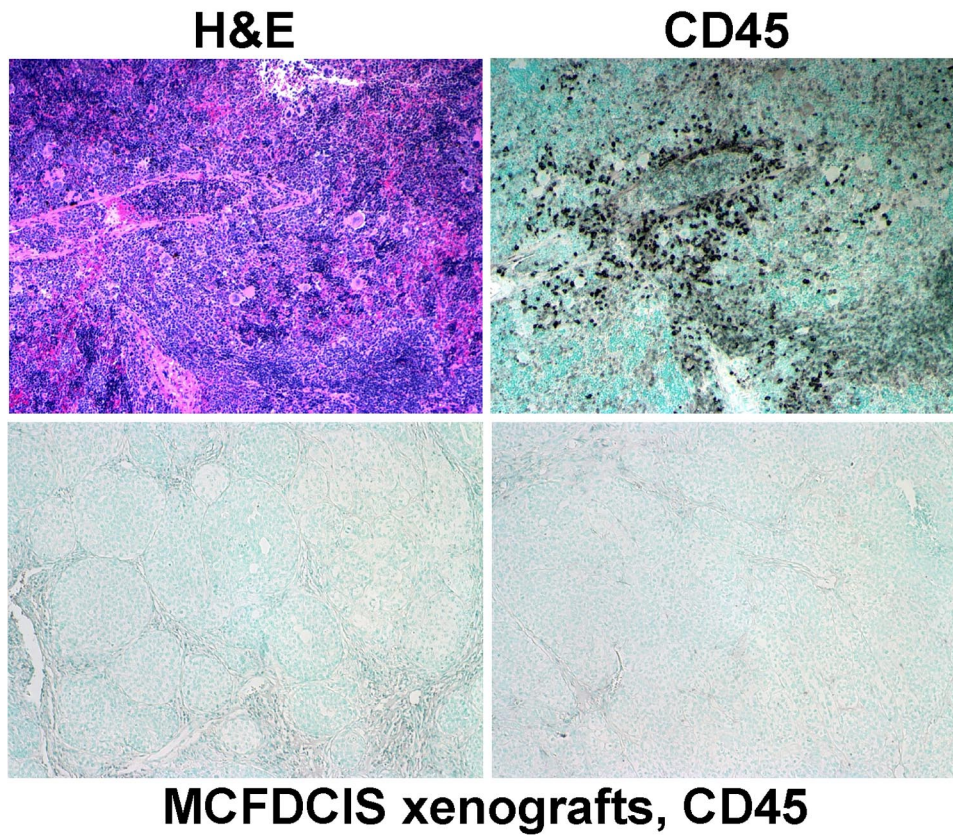

**Fig. S3.** Analysis of the presence of leukocytes in xenografts. Shown is immunohistochemical analysis of CD45 pan-leukocyte antigen expression in MCFDCIS xenografts and in mouse spleen used as positive control. Essentially no CD45+ cells are detected in the xenografts, whereas a large fraction of cells are positive for CD45 in the spleen.

## Array 1

|    | a         | b         | c     | d     | e            | f           | g      | h      | i      | j      | k        | l       | m       | n       |
|----|-----------|-----------|-------|-------|--------------|-------------|--------|--------|--------|--------|----------|---------|---------|---------|
| 1  | POS       | POS       | POS   | POS   | Blank        | Angiogenin  | BDNF   | BLC    | BMP-4  | BMP-6  | CK β 8-1 | CNTF    | EGF     | Eotaxin |
| 2  | NEG       | NEG       | NEG   | NEG   | Blank        | Angiogenin  | BDNF   | BLC    | BMP-4  | BMP-6  | CK β 8-1 | CNTF    | EGF     | Eotaxin |
| 3  | Eotaxin-2 | Eotaxin-3 | FGF-6 | FGF-7 | Fil-3 Ligand | Fractalkine | GCP-2  | GDNF   | GM-CSF | I309   | IFN-γ    | IGFBP-1 | IGFBP-2 | IGFBP-4 |
| 4  | Eotaxin-2 | Eotaxin-3 | FGF-6 | FGF-7 | Fil-3 Ligand | Fractalkine | GCP-2  | GDNF   | GM-CSF | I309   | IFN-γ    | IGFBP-1 | IGFBP-2 | IGFBP-4 |
| 5  | IGF-1     | IL-10     | IL-13 | IL-15 | IL-16        | IL-1α       | IL-1β  | IL-1ra | IL-2   | IL-3   | IL-4     | IL-5    | IL-6    | IL-7    |
| 6  | IGF-1     | IL-10     | IL-13 | IL-15 | IL-16        | IL-1α       | IL-1β  | IL-1ra | IL-2   | IL-3   | IL-4     | IL-5    | IL-6    | IL-7    |
| 7  | Leptin    | LIGHT     | MCP-1 | MCP-2 | MCP-3        | MCP-4       | M-CSF  | MDC    | MIG    | MIP-1β | MIP-3α   | NAP-2   | NT-3    | PARC    |
| 8  | Leptin    | LIGHT     | MCP-1 | MCP-2 | MCP-3        | MCP-4       | M-CSF  | MDC    | MIG    | MIP-1β | MIP-3α   | NAP-2   | NT-3    | PARC    |
| 9  | PDGF-BE   | RANTES    | SCF   | SDF-1 | TARC         | TGF-β1      | TGF-β3 | TNF-α  | TNF-β  | Blank  | Blank    | Blank   | Blank   | Blank   |
| 10 | PDGF-BE   | RANTES    | SCF   | SDF-1 | TARC         | TGF-β1      | TGF-β3 | TNF-α  | TNF-β  | Blank  | Blank    | Blank   | Blank   | Blank   |

## Array 2

|    | a      | b            | c       | d              | e        | f           | g       | h              | i               | j            | k     | l       | m       | n       |
|----|--------|--------------|---------|----------------|----------|-------------|---------|----------------|-----------------|--------------|-------|---------|---------|---------|
| 1  | POS    | POS          | POS     | POS            | Blank    | Acnp30      | AgRP    | Angiopoietin-2 | Amphiregulin    | Axl          | bFGF  | b-NGF   | BTC     | CCL-2B  |
| 2  | NEG    | NEG          | NEG     | NEG            | Blank    | Acnp30      | AgRP    | Angiopoietin-2 | Amphiregulin    | Axl          | bFGF  | b-NGF   | BTC     | CCL-2B  |
| 3  | CTACK  | Dtk          | EGF-R   | ENA-78         | Fas      | FGF-4       | FGF-9   | GCSF           | GITR-Ligand     | GITR         | GRO   | GRO-α   | HCC-4   | HGF     |
| 4  | CTACK  | Dtk          | EGF-R   | ENA-78         | Fas      | FGF-4       | FGF-9   | GCSF           | GITR-Ligand     | GITR         | GRO   | GRO-α   | HCC-4   | HGF     |
| 5  | ICAM-1 | ICAM-3       | IGFBP-3 | IGFBP-6        | IGF-1 SR | IL-1 R4/ST2 | IL-1 RI | IL-11          | IL-12 p40       | IL-12 p70    | IL-17 | IL-2 Rα | IL-6 R  | IL-8    |
| 6  | ICAM-1 | ICAM-3       | IGFBP-3 | IGFBP-6        | IGF-1 SR | IL-1 R4/ST2 | IL-1 RI | IL-11          | IL-12 p40       | IL-12 p70    | IL-17 | IL-2 Rα | IL-6 R  | IL-8    |
| 7  | I-TAC  | Lymphostatin | MIF     | MIP-1α         | MIP-1β   | MIP-3β      | MSP-α   | NT-4           | Osteoprotegerin | Oncostatin M | PIGF  | sop130  | sTNF RI | sTNF-RI |
| 8  | I-TAC  | Lymphostatin | MIF     | MIP-1α         | MIP-1β   | MIP-3β      | MSP-α   | NT-4           | Osteoprotegerin | Oncostatin M | PIGF  | sop130  | sTNF RI | sTNF-RI |
| 9  | TECK   | TIMP-1       | TIMP-2  | Thrombospondin | TRAIL R3 | TRAIL R4    | uPAR    | VEGF           | VEGF-D          | Blank        | Blank | Blank   | Blank   | Blank   |
| 10 | TECK   | TIMP-1       | TIMP-2  | Thrombospondin | TRAIL R3 | TRAIL R4    | uPAR    | VEGF           | VEGF-D          | Blank        | Blank | Blank   | Blank   | Blank   |

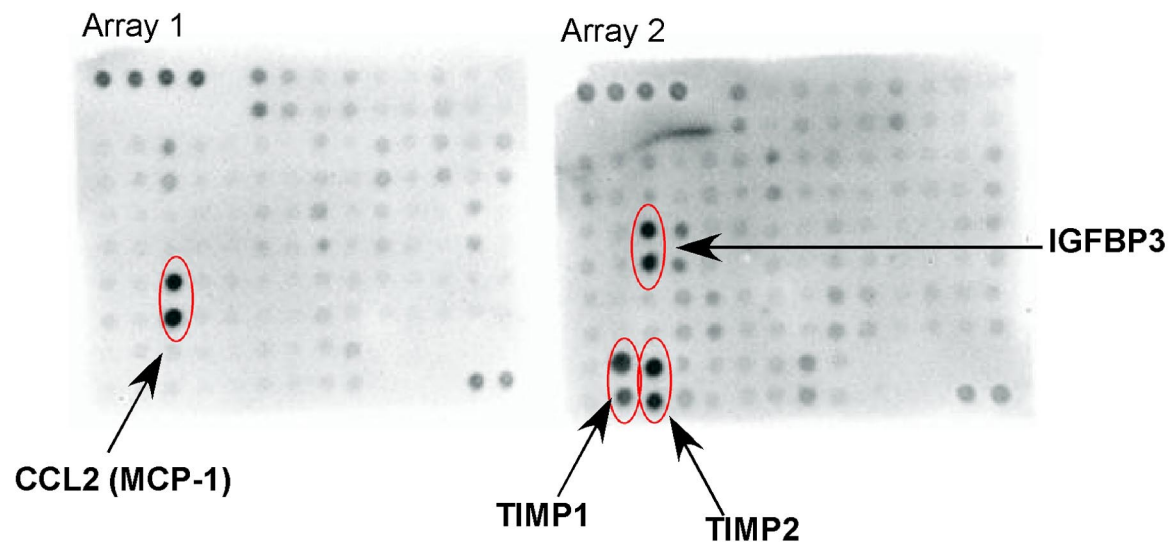

Fig. S4. Analysis of conditioned media of RASFs. Maps of the 2 cytokine arrays (RayBiotech human cytokine array C series 1000) used are shown. At the bottom are results of immunoblot analysis, with the most highly positive spots marked with red circles.



**Table S1. Sequences of the shRNA clones used for the study**

| Symbol       | Clone ID              | Row      | Column    | RNAi seq                      |
|--------------|-----------------------|----------|-----------|-------------------------------|
| <b>MMP9</b>  | <b>TRCN0000051438</b> | <b>C</b> | <b>3</b>  | <b>CCACAACATCACCTATTGGAT</b>  |
| <b>MMP9</b>  | <b>TRCN0000051439</b> | <b>C</b> | <b>4</b>  | <b>GCGGTGATTGACGACGCCTTT</b>  |
| MMP9         | TRCN0000051440        | C        | 5         | CAGTACCGAGAGAAAGCCTAT         |
| MMP9         | TRCN0000051441        | C        | 6         | CAGTTTCCATTTCATCTTCCAA        |
| PTGS2        | TRCN0000045533        | A        | 6         | GCTGAATTTAACACCCTCTAT         |
| <b>PTGS2</b> | <b>TRCN0000045534</b> | <b>A</b> | <b>7</b>  | <b>GCAGATGAAATACCAAGTCTTT</b> |
| PTGS2        | TRCN0000045535        | A        | 8         | CCAGGGCTCAAACATGATGTT         |
| PTGS2        | TRCN0000045536        | A        | 9         | CGTTGTGAATAACATTCCCTT         |
| <b>PTGS2</b> | <b>TRCN0000045537</b> | <b>A</b> | <b>10</b> | <b>CCATTCTCCTTGAAGGACTT</b>   |

Clones in boldface were used for the experiments.
